# Supplementary material
Source: publisher figshare collection journal article supplement (https://frontiersin.figshare.com/ndownloader/files/23354363)
Supplement: Supplementary file 1 [file 23354363]

**Supporting information for:**

**Hotspot of Organic Carbon Export Driven by Mesoscale Eddies in the Slope Region of the Northern South China Sea**

Miao Zhanga, Ying Wua*, Fuqiang Wanga, Dongfeng Xub, Meng Zhouc

a*State Key Laboratory of Estuarine and Coastal Research, East China Normal University, Shanghai 200062, P. R. China*

b*State Key Laboratory of Satellite Ocean Environment Dynamics,* *Second Institute of Oceanography,* *State Oceanic Administration, Hangzhou 310012, P. R. China*

c*Ocean Research Institute, Shanghai Jiao Tong University, Shanghai 200030, P. R. China*

*Corresponding author.

*E-mail address*: [wuying@sklec.ecnu.edu.cn](mailto:wuying@sklec.ecnu.edu.cn) (Y. Wu)

**Contents of this file:**

Figure S1–S6, Table S1-S2

Figure S1. Sampling stations (a) and potential temperature θ-salinity S diagram (b) of June 2015. Red curve represented the potential temperature θ and salinity of SCS water observed by Argo at (113.71°E, 13.46°N) in (a), while blue line represented the θ-S characteristics of west Pacific Ocean at (130.35°E, 18.69°N) in (a). The Argo data was obtained from (http://www.argo.org.cn/).

Figure S2. EEM contours and excitation (black line) and emission (red line) of five PARAFAC components.

Figure S3. Distribution of Temperature (℃) (a), salinity (b), σt (c) in section C in summer 2015.

Figure S4. Potential temperature θ-salinity S diagram and three endmembers in the upper 120 m of SCS. The three endmembers are shw (Shelf water), sur (SCS surface water), and sub (SCS subsurface water).

Figure S5. The correlations between DOC, POC and temperature, salinity, σt in the upper 120 m.

Figure S6. The fraction of shelf water (a), SCS surface water (b), SCS subsurface water (c) on surface and section C in June 2015.

Table S1. The detail information of sampling stations

| Station | Latitude | Longitude | Bottom depth (m) | Date | Time |
| --- | --- | --- | --- | --- | --- |
| L01 | 20°21′N | 114°14′E | 123 | 2015.6.18 | 8:40 |
| L02 | 19°52′N | 114°28′E | 550 | 2015.6.17 | 5:17 |
| L03 | 19°25′N | 114°47′E | 1298 | 2015.6.16 | 10:20 |
| L04 | 18°56′N | 115°05′E | 3000 | 2015.6.15 | 1:00 |
| L05 | 19°09′N | 115°38′E | 3000 | 2015.6.15 | 4:21 |
| L06 | 19°38′N | 115°19′E | 2040 | 2015.6.14 | 8:30 |
| L07 | 20°07′N | 115°04′E | 480 | 2015.6.13 | 13:13 |
| L08 | 20°34′N | 114°45′E | 120 | 2015.6.18 | 19:00 |
| L09 | 20°46′N | 115°17′E | 190 | 2015.6.19 | 5:24 |
| L10 | 20°19′N | 115°34′E | 535 | 2015.6.19 | 15:20 |
| L11 | 19°47′N | 115°52′E | 1527 | 2015.6.20 | 7:30 |
| L12 | 19°25′N | 115°11′E | 1971 | 2015.6.21 | 5:21 |
| L13 | 19°40′N | 116°43′E | 1828 | 2015.6.22-24 |  |
| L14 | 20°08′N | 116°28′E | 975 | 2015.6.24 | 15:00 |
| L15 | 20°31′N | 116°08′E | 608 | 2015.6.24 | 21:15 |
| L16 | 20°59′N | 115°45′E | 225 | 2015.6.25 | 2:30 |
| L17 | 21°4′N | 114°25′E | 81 | 2015.6.29 | 20:50 |

Table S2. Salinity, temperature, DOC, POC of Endmembers

| Endmember | θ (℃) | S | DOC (μmol L-1) | POC (μmol L-1) |
| --- | --- | --- | --- | --- |
| shw | 30.6±0.3 | 31.7±0.2 | 91±0.6 | 10.8±2.7 |
| sur | 30.2±0.6 | 33.9±0.1 | 77±6.3 | 4.5±2.2 |
| sub | 18.4±1.4 | 34.6±0.0 | 54±4.4 | 1.9±1.0 |

shw: Shelf water; sur: SCS surface water; sub: SCS subsurface water
